# Supplementary material for: A fibronectin-coated gold nanostructure composite for electrochemical detection of effects of curcumin-carrying nanoliposomes on human stomach cancer cells
Source: Royal Society of Chemistry journal article supplement (doi:10.1039/c9an01553a), 2019-12-05
Supplement: c9an01553a1.pdf [file c9an01553a1.pdf]

**Fibronectin-coated gold nanostructure composite for electrochemical detection  
of effects of curcumin-carrying nanoliposomes on human stomach cancer cells**

**by Novi Angeline, Intan Rosalina Suhito, Cheol-Hwi Kim, Geun-Pyo Hong, Chun Gwon  
Park, Suk Ho Bhang, Zhengtang Luo and Tae-Hyung Kim**

## Supplementary Figures Caption

**Supplementary Fig. S1.** Optical microscopy images of MKN-28 cells grown on electrode substrates modified by gold deposition in a time-dependent manner: (A) 0 s, (B) 30 s, (C) 60 s, (D) 90 s, and (E) 120 s. (F) FE-SEM characterization of the gold nanostructures–indium tin oxide composite formed after 90 s of gold deposition.

**Supplementary Fig. S2.** Optical microscopy images of MKN-28 cells grown on gold nanostructures–indium tin oxide composites coated with eight different concentrations of fibronectin, after 3 days *in vitro*: (A) 0  $\mu\text{g/mL}$  or no treatment, (B) 1  $\mu\text{g/mL}$ , (C) 3  $\mu\text{g/mL}$ , (D) 5  $\mu\text{g/mL}$ , (E) 7  $\mu\text{g/mL}$ , (F) 10  $\mu\text{g/mL}$ , (G) 15  $\mu\text{g/mL}$ , and (H) 17  $\mu\text{g/mL}$ .

**Supplementary Fig. S3.** Optical microscopy images of MKN-28 cells grown on gold nanostructures–indium tin oxide composites coated with five different concentrations of collagen, after 3 days *in vitro*: (A) 0  $\mu\text{g/mL}$  or no treatment, (B) 1  $\mu\text{g/mL}$ , (C) 3  $\mu\text{g/mL}$ , (D) 5  $\mu\text{g/mL}$ , and (E) 7  $\mu\text{g/mL}$ .

**Supplementary Fig. S4.** Electrochemical detection results and the amounts of cells on gold nanostructures–indium tin oxide composites coated with five different concentrations of collagen. (A) Differential pulse voltammetric (DPV) signals obtained from MKN-28 cells grown on the modified substrates. (B) Calculated peak intensities from graph (A), presented as a bar graph. (C) CCK-8 assay results of MKN-28 cells on the modified substrates. NT, no collagen treatment;  $I_p$ , the intensity of the peak current; Student's *t*-test,  $N = 3$ ; \* $p < 0.05$ ; ns, not significant.

**Supplementary Fig. S5.** The frequency of various curcumin-NLC particle sizes from TEM.

**Supplementary Fig. S6.** Optical microscopy images of MKN-28 cells after treatment with bare nanoliposomes. (A) NT or no treatment, (B) 10  $\mu\text{M}$ , (C) 30  $\mu\text{M}$ , (D) 50  $\mu\text{M}$ , (E) 70  $\mu\text{M}$ , and (F) 100  $\mu\text{M}$ .

**Supplementary Fig. S7.** Electrochemical detection results and the amounts of cells on gold nanostructures–indium tin oxide composites treated with bare nanoliposomes. (A) NT or no treatment, (B) 10  $\mu\text{M}$ , (C) 30  $\mu\text{M}$ , (D) 50  $\mu\text{M}$ , (E) 70  $\mu\text{M}$ , and (F) 100  $\mu\text{M}$ .  $I_p$ , the intensity of the peak current; Student's *t*-test,  $N = 3$ ; \* $p < 0.05$ ; ns, not significant.

## Supplementary Figures

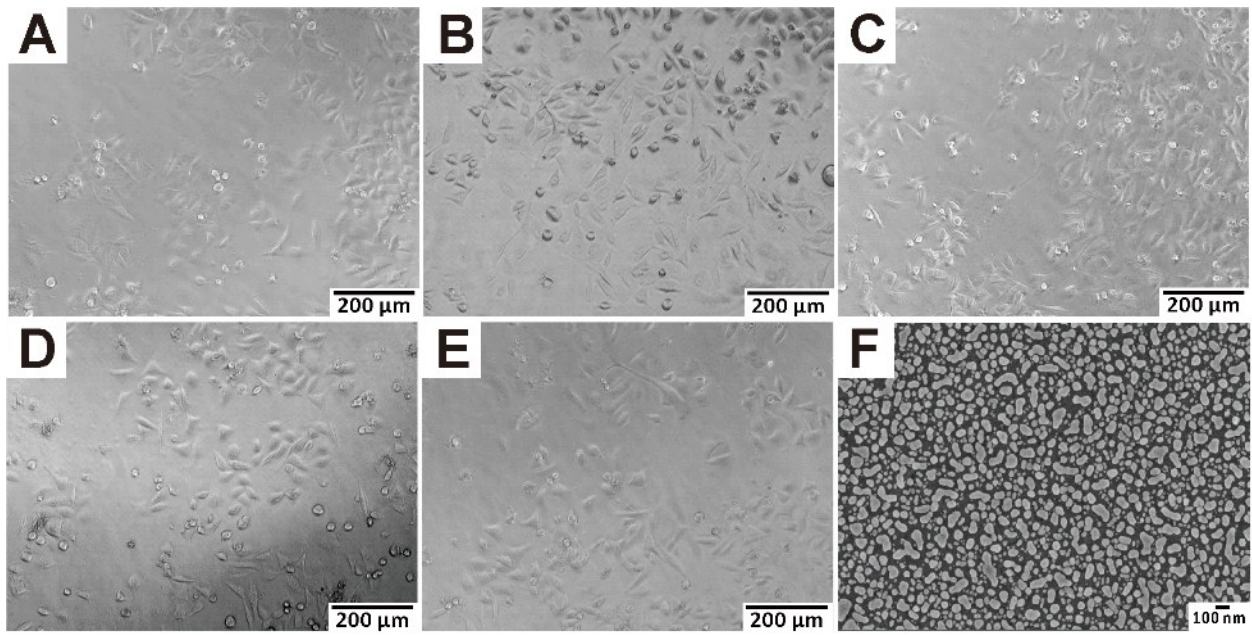

**Supplementary Fig. S1.**

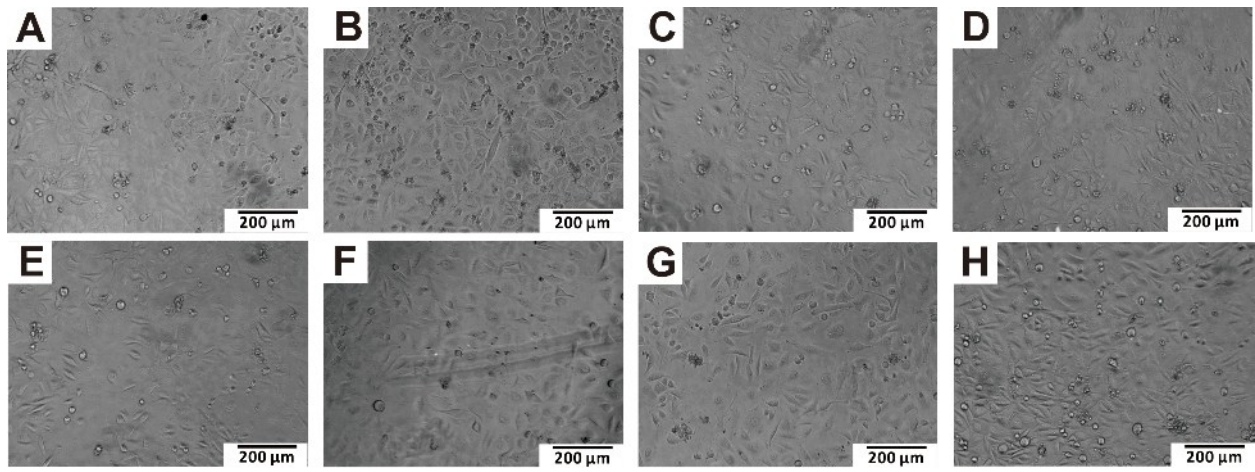

**Supplementary Fig. S2.**

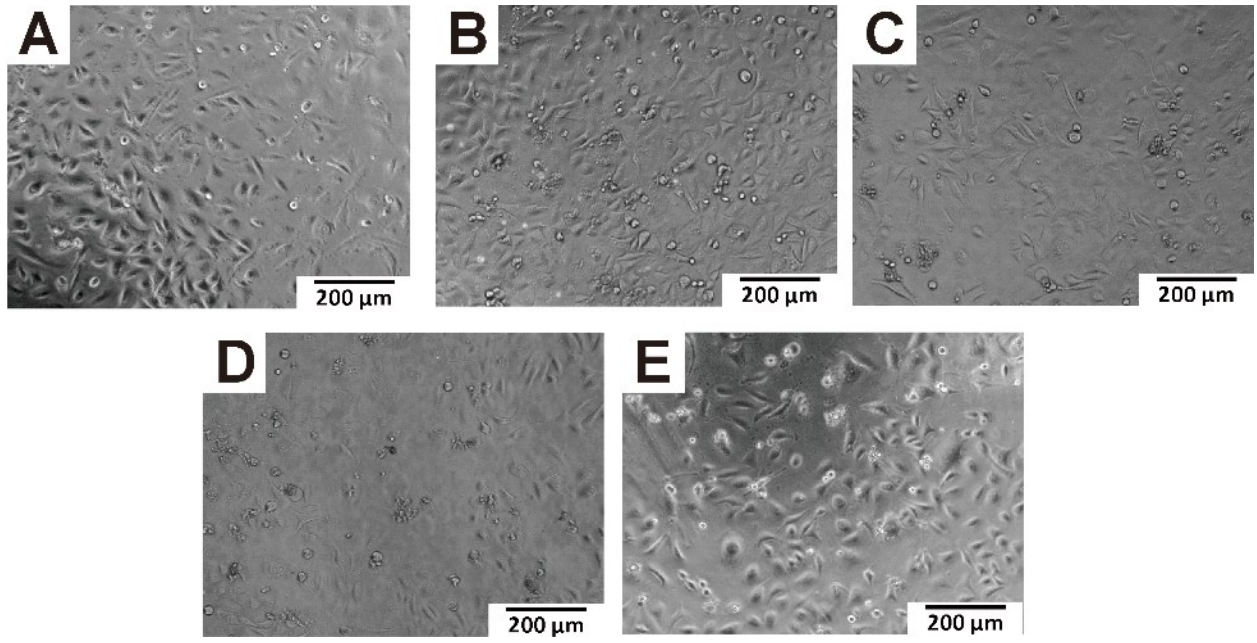

**Supplementary Fig. S3.**

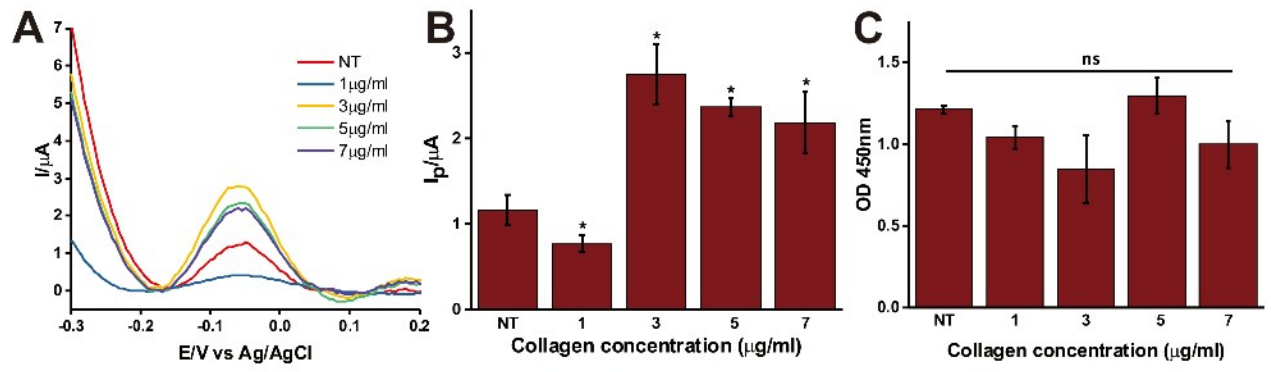

Supplementary Fig. S4.

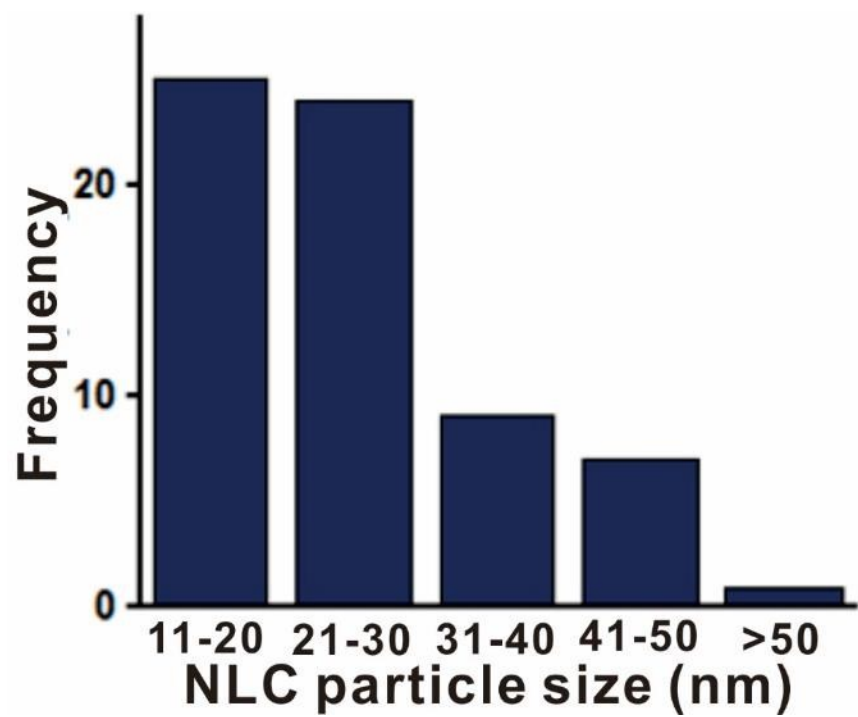

Supplementary Fig. S5.

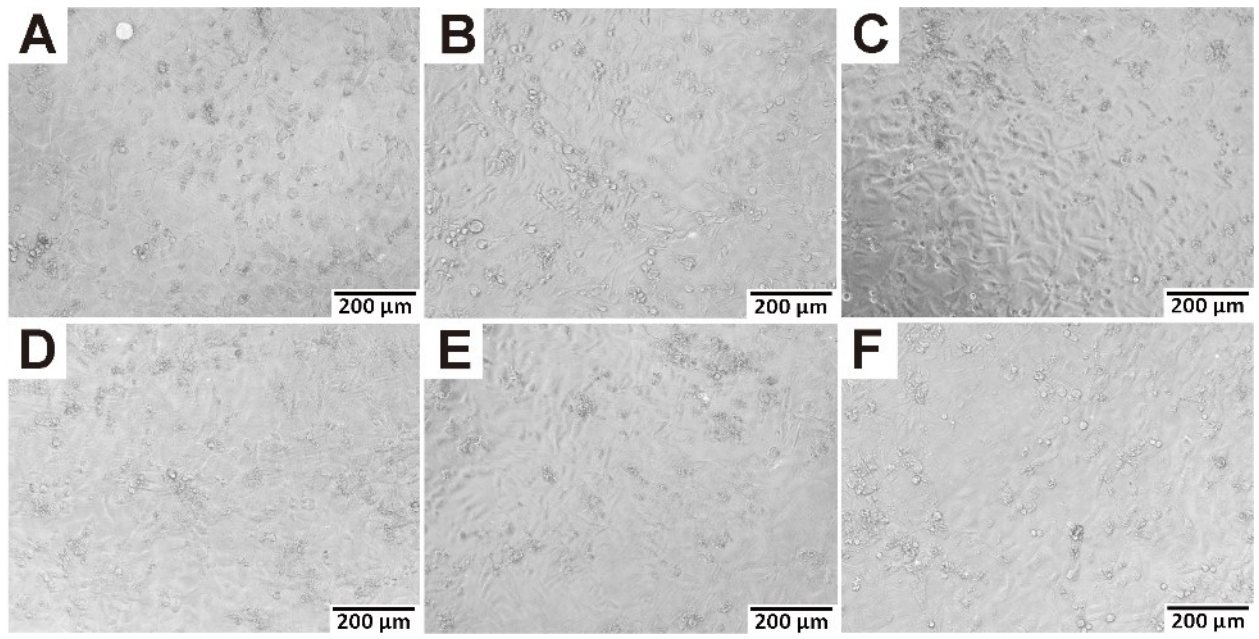

**Supplementary Fig. S6.**



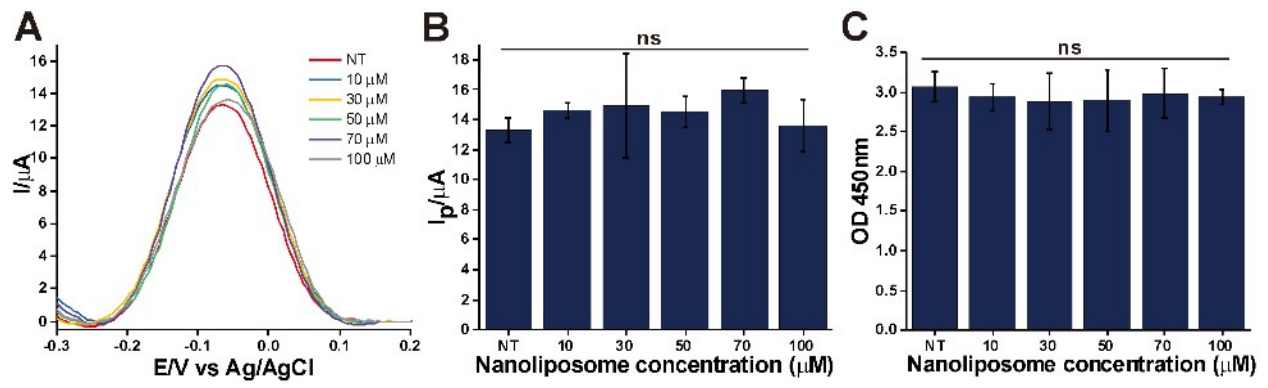

Supplementary Fig. S7.
